# Supplementary material for: A germline mutation in Rab43 gene identified from a cancer family predisposes to a hereditary liver-colon cancer syndrome
Source: Springer Nature journal article supplement (doi:10.1186/s12885-019-5845-4), 2019-06-21
Supplement: MOESM1 [file 16842508]

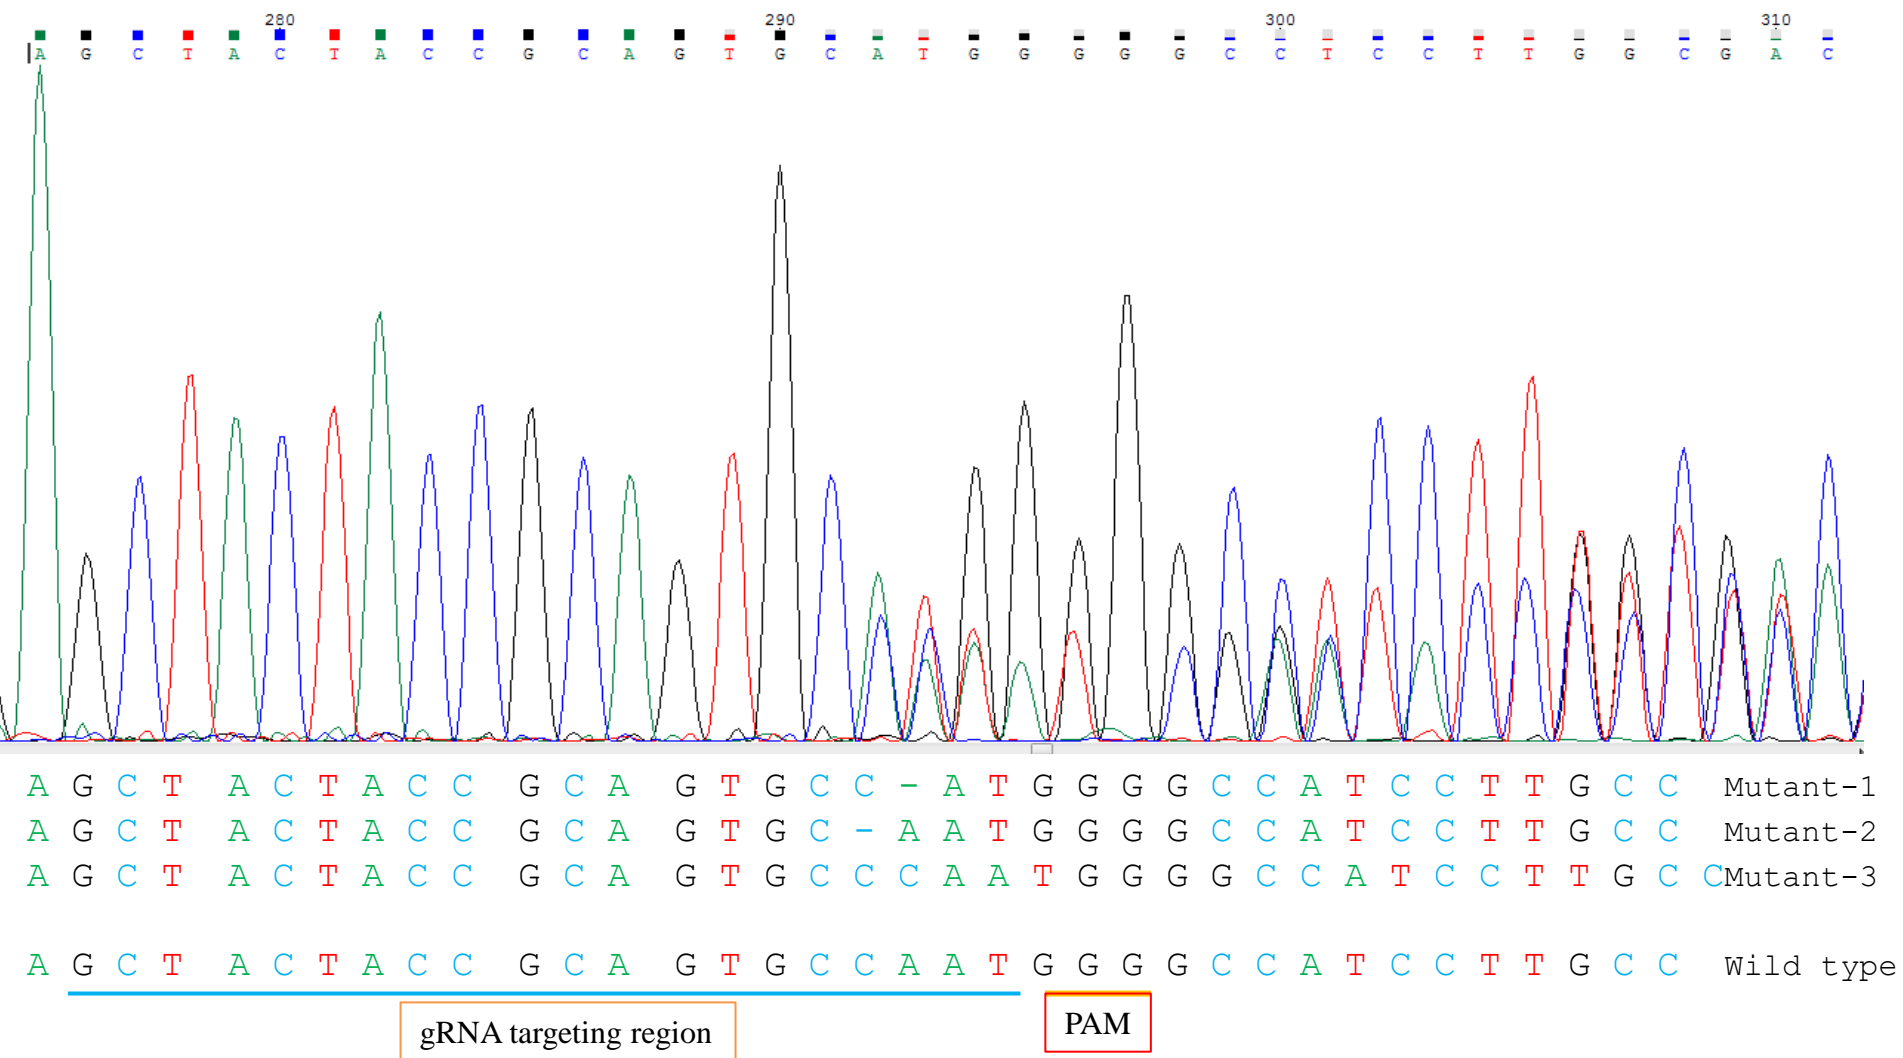

**Fig. S1 Sanger sequencing confirmed the Rab43 knockout HepG2 cell line harbors three Rab43 mutant alleles with reading frame shift mutations in the gRNA targeting region**

Sanger sequencing results are presented by ChromasPro software in the upper panel, a total of three Rab43 mutant alleles were identified as listed in the lower panel. Mutant-1 allele harbors a deletion of A, mutant-2 allele with a deletion of C and mutant-3 allele with an insertion of C before PAM consensus sequence in comparison with the sequence of wild type Rab43 allele.
